# Supplementary material
Source: PubMed Central journal article supplement (PMC4967021)
Supplement: NIHMS800833-supplement.pdf [file NIHMS800833-supplement.pdf]

Supplemental materials for “Transferring the C-terminus of the chemokine CCL21 to CCL19 confers enhanced heparin binding”

Austin J. Barmore<sup>a1</sup>, Sally M. Castex<sup>a1</sup>, Brittany A. Gouletas<sup>a1</sup>, Alex J. Griffith<sup>a1</sup>, Slater W. Metz<sup>a1</sup>, Nicolas G. Muelder<sup>a1</sup>, Michael J. Populin<sup>a1</sup>, David M. Sackett<sup>a1</sup>, Abigail M. Schuster<sup>a1</sup>, and Christopher T. Veldkamp<sup>\*a,b</sup>

<sup>a</sup> Department of Chemistry, University of Wisconsin-Whitewater, 800 West Main Street, Whitewater, WI 53190, USA

<sup>b</sup> Department of Biochemistry, Medical College of Wisconsin, 8701 Watertown Plank Road, Milwaukee, WI 53226, USA

\* Corresponding Author. Email: veldkamc@uww.edu

<sup>1</sup>These authors contributed equally.

The first four data reports that follow are for the elution of CCL21, CCL21trunc, CCL19 and the chimera from a 1 mL HiTrap® heparin HP column. The next four data reports are for the elution of CCL21, CCL21trunc, CCL19 and the chimera from a 1 mL HiTrap® SP-sepharose HP column.

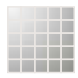

SHIMADZU  
LabSolutions

# Analysis Report

## <Sample Information>

Sample Name : CCL21  
 Sample ID : CCL21  
 Data Filename : 20160421CCL21-1300grad3.lcd  
 Method Filename : heparinandcationexchange.lcm  
 Batch Filename :  
 Vial # : -1  
 Injection Volume : 20 uL  
 Date Acquired : 4/21/2016 9:49:39 AM  
 Date Processed : 4/21/2016 10:44:42 AM  
 Sample Type : Unknown  
 Acquired by : USER  
 Processed by : USER

## <Chromatogram>

mAU

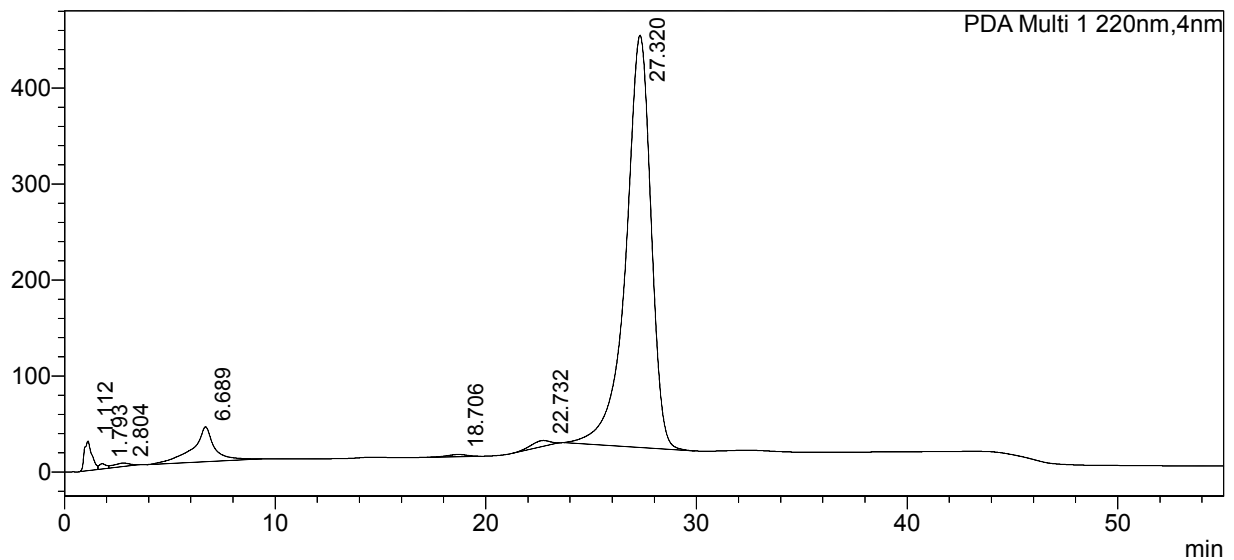

## <Peak Table>

PDA Ch1 220nm

| Peak# | Ret. Time | Area     | Height | Conc.  | Unit | Mark | Name |
|-------|-----------|----------|--------|--------|------|------|------|
| 1     | 1.112     | 774596   | 30997  | 1.938  |      |      |      |
| 2     | 1.793     | 132960   | 5665   | 0.333  |      | V    |      |
| 3     | 2.804     | 204882   | 3668   | 0.513  |      | V    |      |
| 4     | 6.689     | 2617602  | 36338  | 6.549  |      |      |      |
| 5     | 18.706    | 148803   | 2266   | 0.372  |      |      |      |
| 6     | 22.732    | 396817   | 6031   | 0.993  |      |      |      |
| 7     | 27.320    | 35695025 | 429271 | 89.303 |      |      |      |
| Total |           | 39970685 | 514237 |        |      |      |      |

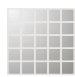SHIMADZU  
LabSolutions

# Analysis Report

## <Sample Information>

Sample Name : CCL21trunc  
 Sample ID : CCL21trunc  
 Data Filename : 20160421CCL21trunc-1300grad4.lcd  
 Method Filename : heparinandcationexchange.lcm  
 Batch Filename :  
 Vial # : -1  
 Injection Volume : 20 uL  
 Date Acquired : 4/21/2016 10:46:05 AM  
 Date Processed : 4/21/2016 11:41:07 AM

Sample Type : Unknown  
 Acquired by : USER  
 Processed by : USER

## <Chromatogram>

mAU

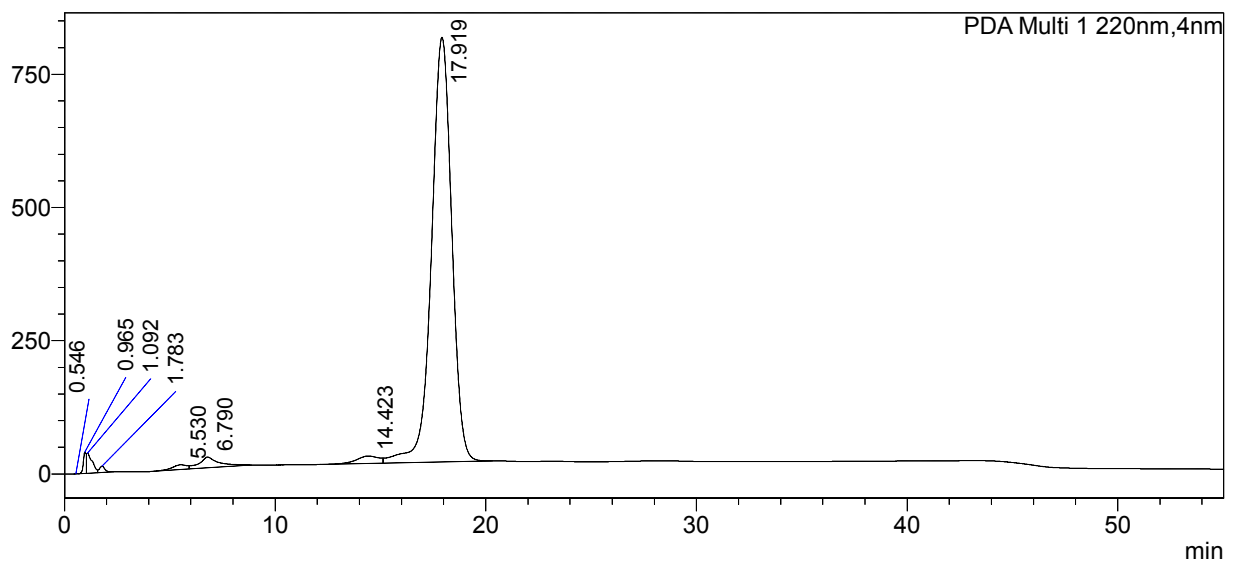

## <Peak Table>

PDA Ch1 220nm

| Peak# | Ret. Time | Area     | Height | Conc.  | Unit | Mark | Name |
|-------|-----------|----------|--------|--------|------|------|------|
| 1     | 0.546     | 1853     | 309    | 0.003  |      |      |      |
| 2     | 0.965     | 367435   | 40221  | 0.639  |      |      |      |
| 3     | 1.092     | 698974   | 37464  | 1.215  |      | V    |      |
| 4     | 1.783     | 215818   | 11964  | 0.375  |      | V    |      |
| 5     | 5.530     | 447676   | 8939   | 0.778  |      |      |      |
| 6     | 6.790     | 1291390  | 20062  | 2.245  |      | V    |      |
| 7     | 14.423    | 1054932  | 14057  | 1.834  |      |      |      |
| 8     | 17.919    | 53440024 | 796879 | 92.910 |      | V    |      |
| Total |           | 57518102 | 929896 |        |      |      |      |



SHIMADZU  
LabSolutions

# Analysis Report

## <Sample Information>

Sample Name : CCL19  
 Sample ID : CCL19  
 Data Filename : 20160421CCL19-1300grad2.lcd  
 Method Filename : heparinandcationexchange.lcm  
 Batch Filename :  
 Vial # : -1  
 Injection Volume : 20 uL  
 Date Acquired : 4/21/2016 8:52:51 AM  
 Date Processed : 4/21/2016 9:47:53 AM  
 Sample Type : Unknown  
 Acquired by : USER  
 Processed by : USER

## <Chromatogram>

mAU

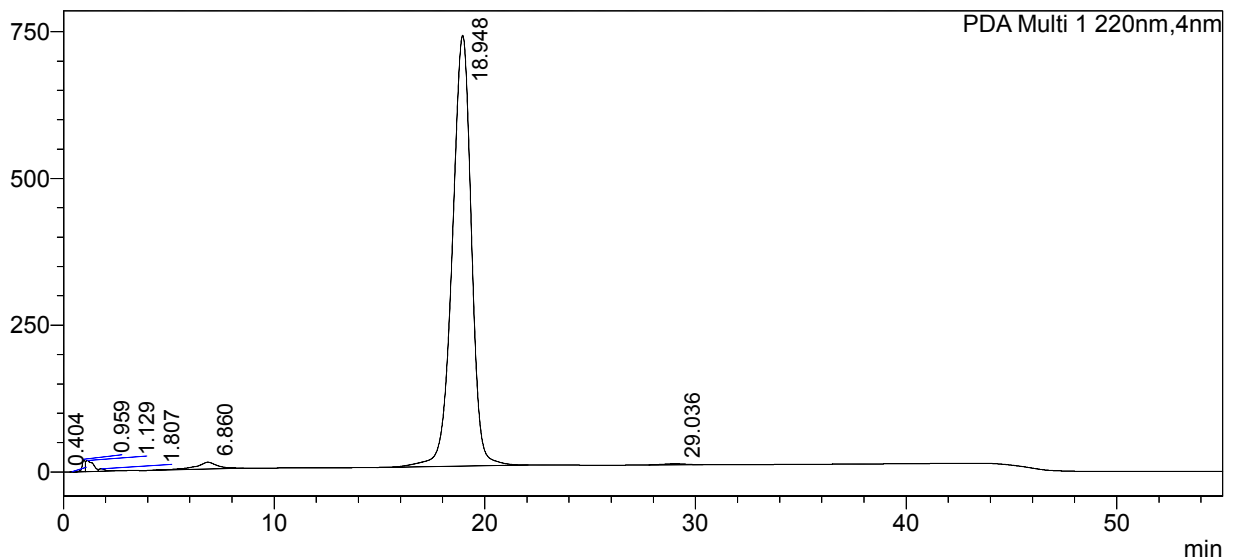

## <Peak Table>

PDA Ch1 220nm

| Peak# | Ret. Time | Area     | Height | Conc.  | Unit | Mark | Name |
|-------|-----------|----------|--------|--------|------|------|------|
| 1     | 0.404     | 1076     | 206    | 0.002  |      |      |      |
| 2     | 0.959     | 213376   | 21456  | 0.446  |      |      |      |
| 3     | 1.129     | 449791   | 19150  | 0.940  |      | V    |      |
| 4     | 1.807     | 80703    | 4294   | 0.169  |      | V    |      |
| 5     | 6.860     | 850544   | 11626  | 1.777  |      |      |      |
| 6     | 18.948    | 46156326 | 733929 | 96.410 |      |      |      |
| 7     | 29.036    | 123188   | 1724   | 0.257  |      |      |      |
| Total |           | 47875004 | 792386 |        |      |      |      |



SHIMADZU  
LabSolutions

# Analysis Report

## <Sample Information>

Sample Name : Chimera  
 Sample ID : Chimera  
 Data Filename : 20160421Chimera-1300grad1.lcd  
 Method Filename : heparinandcationexchange.lcm  
 Batch Filename :  
 Vial # : -1  
 Injection Volume : 20 uL  
 Date Acquired : 4/21/2016 7:53:44 AM  
 Date Processed : 4/21/2016 8:48:47 AM  
 Sample Type : Unknown  
 Acquired by : USER  
 Processed by : USER

## <Chromatogram>

mAU

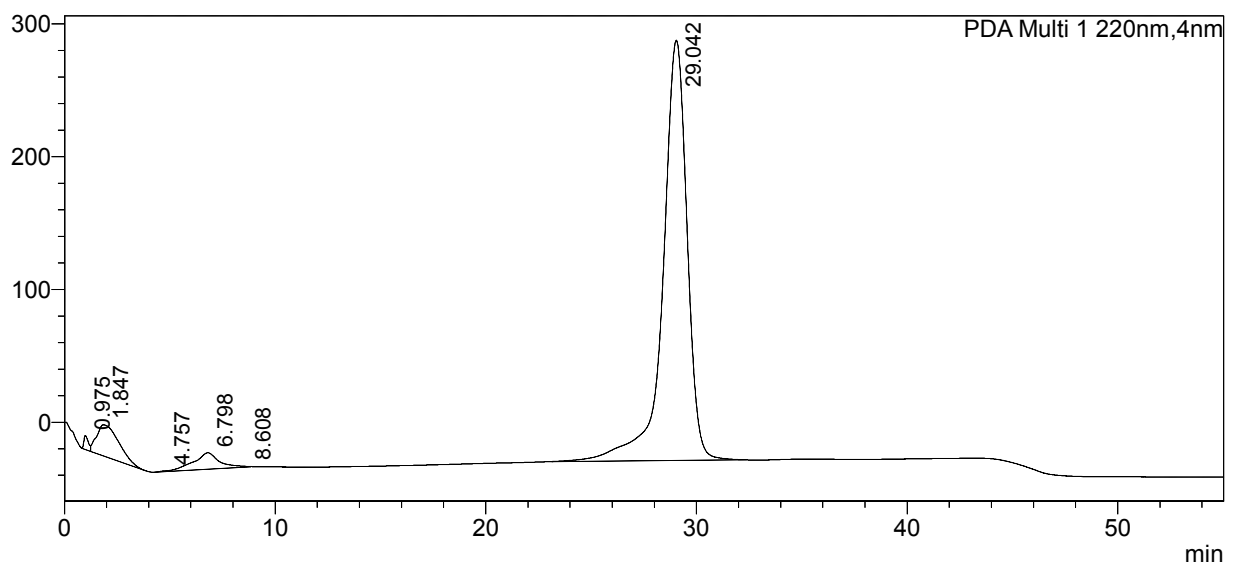

## <Peak Table>

PDA Ch1 220nm

| Peak# | Ret. Time | Area     | Height | Conc.  | Unit | Mark | Name |
|-------|-----------|----------|--------|--------|------|------|------|
| 1     | 0.975     | 155304   | 10331  | 0.548  |      |      |      |
| 2     | 1.847     | 1751165  | 23481  | 6.182  |      | V    |      |
| 3     | 4.757     | 10054    | 651    | 0.035  |      |      |      |
| 4     | 6.798     | 1066968  | 12438  | 3.767  |      | V    |      |
| 5     | 8.608     | 5898     | 621    | 0.021  |      | V    |      |
| 6     | 29.042    | 25336073 | 316484 | 89.446 |      |      |      |
| Total |           | 28325462 | 364007 |        |      |      |      |

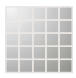SHIMADZU  
LabSolutions

# Analysis Report

## <Sample Information>

Sample Name : ccl21  
 Sample ID : ccl21  
 Data Filename : 20160426SPCCL21\_2.lcd  
 Method Filename : heparinandcationexchange.lcm  
 Batch Filename :  
 Vial # : -1  
 Injection Volume : 20 uL  
 Date Acquired : 4/26/2016 8:58:45 AM  
 Date Processed : 4/26/2016 9:53:48 AM

Sample Type : Unknown  
 Acquired by : USER  
 Processed by : USER

## <Chromatogram>

mAU

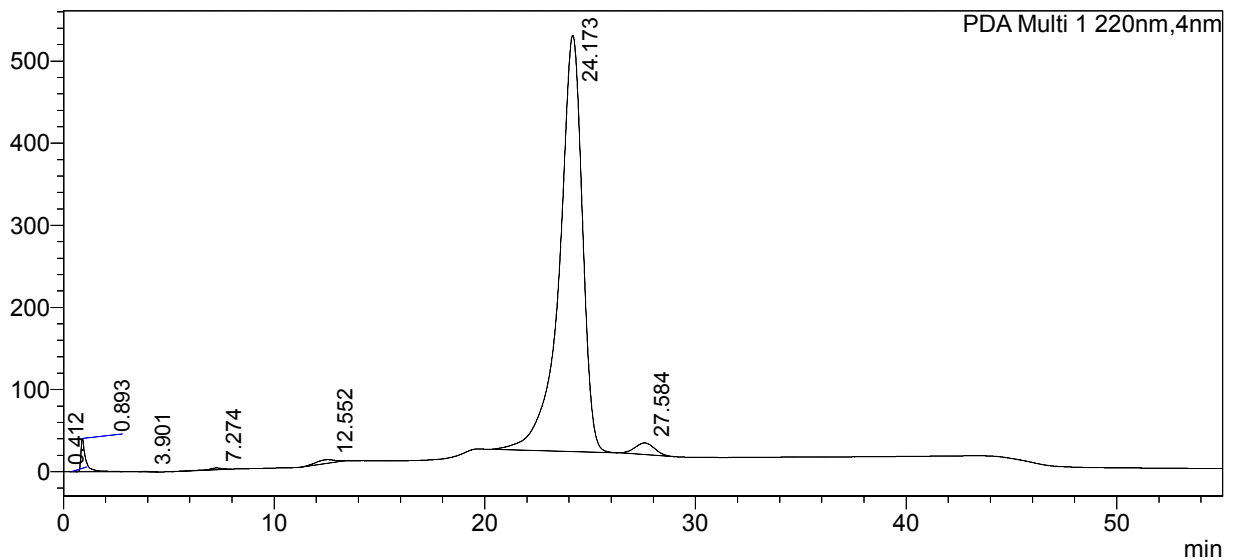

## <Peak Table>

PDA Ch1 220nm

| Peak# | Ret. Time | Area     | Height | Conc.  | Unit | Mark | Name |
|-------|-----------|----------|--------|--------|------|------|------|
| 1     | 0.412     | 3104     | 372    | 0.008  |      |      |      |
| 2     | 0.893     | 642401   | 40762  | 1.587  |      | S    |      |
| 3     | 3.901     | 10247    | 346    | 0.025  |      |      |      |
| 4     | 7.274     | 86863    | 2034   | 0.215  |      |      |      |
| 5     | 12.552    | 286610   | 4337   | 0.708  |      |      |      |
| 6     | 24.173    | 38560473 | 506654 | 95.247 |      |      |      |
| 7     | 27.584    | 894928   | 13969  | 2.211  |      |      |      |
| Total |           | 40484625 | 568473 |        |      |      |      |

SHIMADZU  
LabSolutions

# Analysis Report

## <Sample Information>

Sample Name : ccl21trunc  
 Sample ID : ccl21trunc  
 Data Filename : 20160426SPCCL21trunc\_4.lcd  
 Method Filename : heparinandcationexchange.lcm  
 Batch Filename :  
 Vial # : -1  
 Injection Volume : 20 uL  
 Date Acquired : 4/26/2016 10:52:27 AM  
 Date Processed : 4/26/2016 11:47:30 AM

Sample Type : Unknown  
 Acquired by : USER  
 Processed by : USER

## <Chromatogram>

mAU

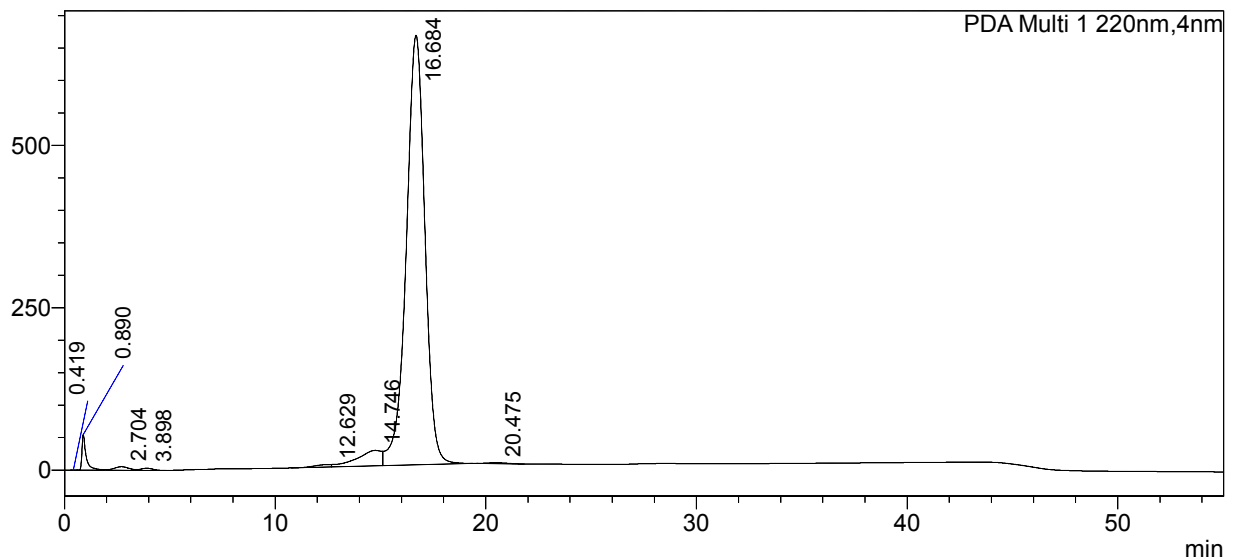

## <Peak Table>

PDA Ch1 220nm

| Peak# | Ret. Time | Area     | Height | Conc.  | Unit | Mark | Name |
|-------|-----------|----------|--------|--------|------|------|------|
| 1     | 0.419     | 1257     | 129    | 0.003  |      | V    |      |
| 2     | 0.890     | 765533   | 54538  | 1.732  |      |      |      |
| 3     | 2.704     | 269995   | 5507   | 0.611  |      | V    |      |
| 4     | 3.898     | 127503   | 3285   | 0.288  |      | V    |      |
| 5     | 12.629    | 208645   | 3805   | 0.472  |      |      |      |
| 6     | 14.746    | 1936842  | 23816  | 4.381  |      | V    |      |
| 7     | 16.684    | 40802544 | 661544 | 92.291 |      | V    |      |
| 8     | 20.475    | 98353    | 1451   | 0.222  |      |      |      |
| Total |           | 44210671 | 754074 |        |      |      |      |





SHIMADZU  
LabSolutions

# Analysis Report

## <Sample Information>

|                  |                                |              |           |
|------------------|--------------------------------|--------------|-----------|
| Sample Name      | : ccl19                        | Sample Type  | : Unknown |
| Sample ID        | : ccl19                        |              |           |
| Data Filename    | : 20160426SPCCL19_3.lcd        |              |           |
| Method Filename  | : heparinandcationexchange.lcm |              |           |
| Batch Filename   | :                              |              |           |
| Vial #           | : -1                           |              |           |
| Injection Volume | : 20 uL                        | Acquired by  | : USER    |
| Date Acquired    | : 4/26/2016 9:56:06 AM         | Processed by | : USER    |
| Date Processed   | : 4/26/2016 10:51:08 AM        |              |           |

## <Chromatogram>

mAU

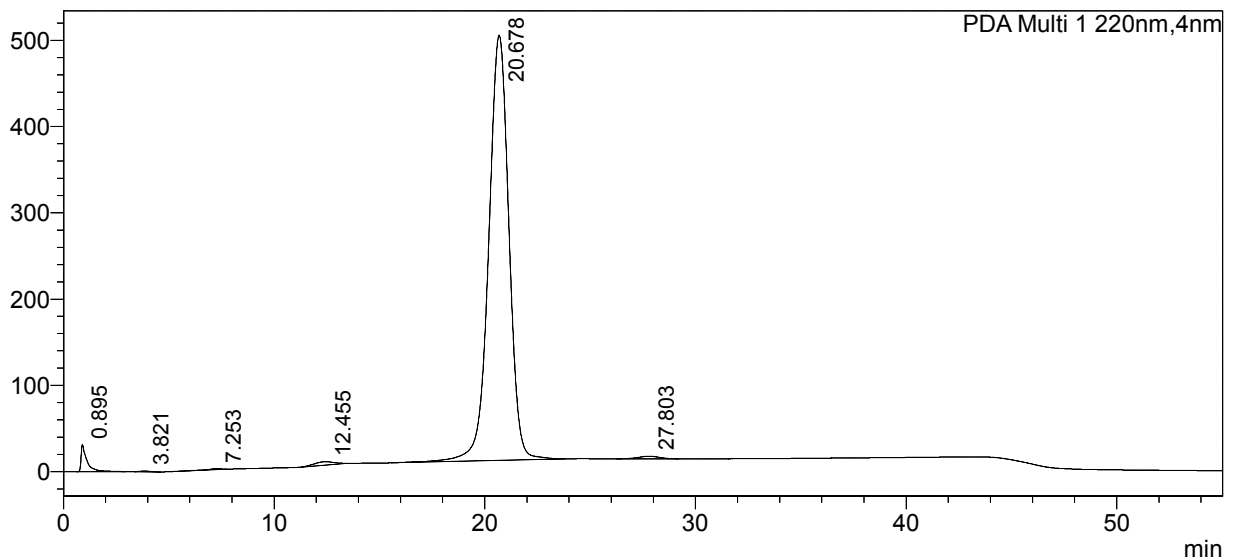

## <Peak Table>

PDA Ch1 220nm

| Peak# | Ret. Time | Area     | Height | Conc.  | Unit | Mark | Name |
|-------|-----------|----------|--------|--------|------|------|------|
| 1     | 0.895     | 608353   | 31679  | 1.785  |      |      |      |
| 2     | 3.821     | 26749    | 796    | 0.078  |      |      |      |
| 3     | 7.253     | 41019    | 874    | 0.120  |      |      |      |
| 4     | 12.455    | 254818   | 3809   | 0.748  |      |      |      |
| 5     | 20.678    | 32936264 | 492840 | 96.657 |      |      |      |
| 6     | 27.803    | 208301   | 3026   | 0.611  |      |      |      |
| Total |           | 34075505 | 533025 |        |      |      |      |

SHIMADZU  
LabSolutions

# Analysis Report

## <Sample Information>

|                  |                                |              |           |
|------------------|--------------------------------|--------------|-----------|
| Sample Name      | : chimera                      | Sample Type  | : Unknown |
| Sample ID        | : chimera                      |              |           |
| Data Filename    | : 20160426SPChimera1.lcd       |              |           |
| Method Filename  | : heparinandcationexchange.lcm |              |           |
| Batch Filename   | :                              |              |           |
| Vial #           | : -1                           |              |           |
| Injection Volume | : 20 uL                        |              |           |
| Date Acquired    | : 4/26/2016 8:01:49 AM         | Acquired by  | : USER    |
| Date Processed   | : 4/26/2016 8:56:52 AM         | Processed by | : USER    |

## <Chromatogram>

mAU

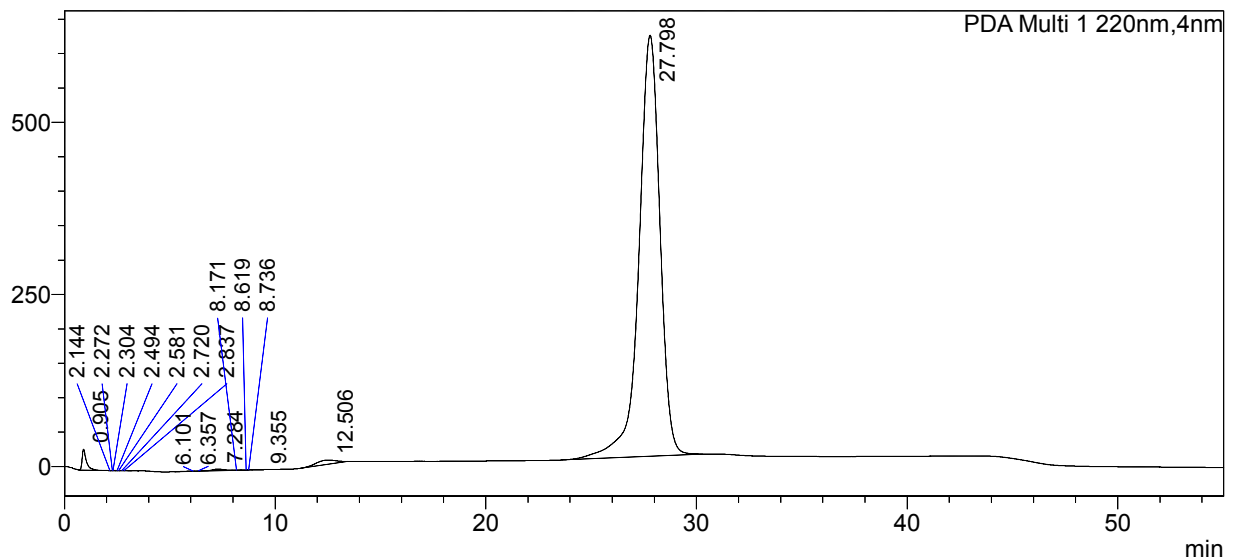

## <Peak Table>

PDA Ch1 220nm

| Peak# | Ret. Time | Area     | Height | Conc.  | Unit | Mark | Name |
|-------|-----------|----------|--------|--------|------|------|------|
| 1     | 0.905     | 423610   | 30335  | 0.974  |      |      |      |
| 2     | 2.144     | 1287     | 216    | 0.003  |      | V    |      |
| 3     | 2.272     | 1641     | 324    | 0.004  |      | V    |      |
| 4     | 2.304     | 2790     | 320    | 0.006  |      | V    |      |
| 5     | 2.494     | 1672     | 402    | 0.004  |      | V    |      |
| 6     | 2.581     | 2385     | 405    | 0.005  |      | V    |      |
| 7     | 2.720     | 4153     | 356    | 0.010  |      | V    |      |
| 8     | 2.837     | 2812     | 294    | 0.006  |      | V    |      |
| 9     | 6.101     | 14855    | 456    | 0.034  |      | V    |      |
| 10    | 6.357     | 7172     | 428    | 0.016  |      | V    |      |
| 11    | 7.284     | 102461   | 2510   | 0.236  |      | V    |      |
| 12    | 8.171     | 6035     | 245    | 0.014  |      | V    |      |
| 13    | 8.619     | 2950     | 143    | 0.007  |      | V    |      |
| 14    | 8.736     | 1279     | 121    | 0.003  |      | V    |      |
| 15    | 9.355     | 1258     | 29     | 0.003  |      | V    |      |
| 16    | 12.506    | 414866   | 6111   | 0.954  |      |      |      |
| 17    | 27.798    | 42504159 | 611318 | 97.721 |      |      |      |
| Total |           | 43495385 | 654014 |        |      |      |      |
